# Supplementary material for: Synthesis, characterization and electrochemical properties of bis(μ2-perchlorato)tricopper(ii) complexes derived from succinoyldihydrazones
Source: Royal Society of Chemistry journal article supplement (doi:10.1039/c3ra42048e), 2013-01-01
Supplement: c3ra42048e.pdf [file c3ra42048e.pdf]

## ELECTRONIC SUPPLEMENTARY INFORMATION

### Synthesis, characterization and electrochemical properties of bis( $\mu_2$ -perchlorato)tricopper (II) complexes derived from succinoyldihydrazones

R. Borthakur<sup>a</sup>, A. Kumar<sup>b</sup>, A. Lemtur<sup>a</sup> and R. A. Lal<sup>a\*</sup>

a, Department of Chemistry, North- Eastern Hill University, Shillong-793022, Meghalaya, India.

b, Department of Chemistry, Faculty of Science and Agriculture, The University of West-Indies, St Augustine, Trinidad and Tobago, West-Indies.

### Contents

|                                                                                                                                                                           |                         |
|---------------------------------------------------------------------------------------------------------------------------------------------------------------------------|-------------------------|
| Table for Effective magnetic moment, magnetic parameters and electronic spectral data for homotrinary copper (II) complexes derived from succinoyldihydrazones - Table S1 | Pg. S1                  |
| Table for Structurally significant infrared (IR) bands (in $\text{cm}^{-1}$ ) for succinoyldihydrazones and their homotrinary copper (II) complexes -Table S2             | Pg. S2                  |
| Table for Peak assignment in the mass spectra of homotrinary copper (II) complexes - Table S3                                                                             | Pg. S3                  |
| Mass spectra of the complexes <b>1</b> and <b>2</b>                                                                                                                       | - Fig. S1- S2 Pg. S4-S5 |
| Electron Paramagnetic Resonance Spectra of the complexes <b>2</b> and <b>3</b>                                                                                            | - Fig. S3-S4 Pg. S6     |
| Cyclic Voltammetry of the complexes <b>2</b> and <b>3</b>                                                                                                                 | - Fig. S5-S6 Pg. S7     |

Table S1: Effective magnetic moment, magnetic parameters and electronic spectral data for homotrimeric copper (II) complexes derived from succinoyldihydrazones

| Sl. No. | Complex                                                           | Magnetic Moment $\mu_{\text{eff}}$ (BM) |                       | Temp | Solid/<br>Solution | $g_{\parallel}$ | $g^{\perp}$ | $g_{\text{av}}$ | $A_{\parallel}$ ( $A_3$ ) | $\Delta M_s=2$ | $A_{\perp}$ ( $A_1$ ) | $g_{\parallel}/A_{\parallel}$ | Electronic Spectral bands $\lambda_{\text{max}}$ (nm), $\epsilon_{\text{max}}$ ( $\text{dm}^3\text{cm}^{-1}\text{mol}^{-1}$ ) |                                                                                                       |
|---------|-------------------------------------------------------------------|-----------------------------------------|-----------------------|------|--------------------|-----------------|-------------|-----------------|---------------------------|----------------|-----------------------|-------------------------------|-------------------------------------------------------------------------------------------------------------------------------|-------------------------------------------------------------------------------------------------------|
|         |                                                                   | Per molecular formula                   | Per empirical formula |      |                    |                 |             |                 |                           |                |                       |                               | Solid                                                                                                                         | Solution                                                                                              |
| 1.      | $[\text{Cu}_3(\text{L}^1)(\text{ClO}_4)_2]$                       | 1.79                                    | 1.04                  | RT   | Solid              | -               | -           | 2.038           | -                         | -              | -                     | -                             | 440, 640                                                                                                                      | 300( 9690),317( 8581),<br>381( 8570 ), 650( 65 )<br>[293(7100),330(5200)] <sup>a</sup>                |
|         |                                                                   |                                         |                       | LNT  | Solid              | 2.219           | 2.032       | 2.094           | 180                       | -              | 55                    | 132.3                         |                                                                                                                               |                                                                                                       |
|         |                                                                   |                                         |                       | LNT  | Solution           | 2.281           | 2.038       | 2.119           | 95                        | -              | 60                    | 257.5                         |                                                                                                                               |                                                                                                       |
| 2.      | $[\text{Cu}_3(\text{L}^2)(\text{ClO}_4)_2(\text{H}_2\text{O})_3]$ | 1.87                                    | 1.08                  | RT   | Solid              | -               | -           | 2.051           | -                         | -              | -                     | -                             | 470, 660                                                                                                                      | 330(22000), 420 (21300), 520 (224)<br>[312(5400), 327 (6200),<br>365 (5800), 382 (5400)] <sup>a</sup> |
|         |                                                                   |                                         |                       | LNT  | Solid              | 2.219           | 2.026       | 2.090           | 180                       | 4.064          | 55                    | 132.2                         |                                                                                                                               |                                                                                                       |
|         |                                                                   |                                         |                       | LNT  | Solution           | 2.169           | 2.041       | 2.082           | 120                       | -              | -                     | 193.9                         |                                                                                                                               |                                                                                                       |
| 3.      | $[\text{Cu}_3(\text{L}^3)(\text{ClO}_4)_2]$                       | 2.45                                    | 1.42                  | RT   | Solid              | -               | -           | 2.048           | -                         | -              | -                     | -                             | 330, 405,<br>620                                                                                                              | 305(23250), 320(21250), 393 (21500), 650 (77)<br>[292(8500), 340 (6600),<br>352 (5600)] <sup>a</sup>  |
|         |                                                                   |                                         |                       | LNT  | Solid              | -               | -           | 2.048           | -                         | -              | -                     | -                             |                                                                                                                               |                                                                                                       |
|         |                                                                   |                                         |                       | LNT  | Solution           | 2.193           | 2.048       | 2.096           | 140                       | -              | 30                    | 168.0                         |                                                                                                                               |                                                                                                       |

a, ligand bands are given in square bracket

Table S2: Structurally significant infrared (IR) bands (in  $\text{cm}^{-1}$ ) for succinoyldihydrazones and their homotrimeric copper (II) complexes.

| Sl. No. | Ligand/ complex                                                   | $\nu(\text{OH}+\text{NH})$ | $\nu(\text{C}=\text{O})$ | $\nu(\text{C}=\text{N})$ | Amide II + (C-O)Phenyl/<br>Naphthyl | $\nu(\text{NCO}-)$    | $\nu(\text{C}-\text{O})$ | $\nu(\text{M}-\text{O})$<br>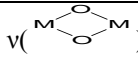 | $\nu(\text{M}-\text{O})$<br>(Phenolic) | $\nu(\text{M}-\text{O})$<br>(enolate) | $\nu(\text{M}-\text{N})$ | $\nu(\text{ClO}_4)^-$                        |
|---------|-------------------------------------------------------------------|----------------------------|--------------------------|--------------------------|-------------------------------------|-----------------------|--------------------------|-----------------------------------------------------------------------------------------------------------------|----------------------------------------|---------------------------------------|--------------------------|----------------------------------------------|
|         | ( $\text{H}_4\text{L}^1$ )                                        | 3421 (s)<br>3199 (s)       | 1659 (s)                 | 1609 (s)<br>1622 (s)     | 1566 (s)                            | -                     | 1269 (s)                 | -                                                                                                               | -                                      | -                                     | -                        |                                              |
|         | ( $\text{H}_4\text{L}^2$ )                                        | 3235 (s)                   | 1675 (s)                 | 1604 (ssh)<br>1623 (s)   | 1530 (s)                            | -                     | 1280 (m)                 | -                                                                                                               | -                                      | -                                     | -                        |                                              |
|         | ( $\text{H}_4\text{L}^3$ )                                        | 3433 (m)<br>3190 (m)       | 1669 (s)                 | 1615 (s)                 | 1564 (s)                            | -                     | 1267 (s)                 | -                                                                                                               | -                                      | -                                     | -                        |                                              |
| 1.      | $[\text{Cu}_3(\text{L}^1)(\text{ClO}_4)_2]$                       | 3433(mbr)                  | -                        | 1603 (s)                 | 1533 (s)                            | 1533 <sup>a</sup> (s) | 1280 (m)                 | 680(w)<br>491(m)                                                                                                | 536 (w)                                | 449 (w)<br>426 (w)                    | 356(m)<br>338(m)         | 1155 (msh), 1121 (s),<br>1100(s), 1080 (ssh) |
| 2.      | $[\text{Cu}_3(\text{L}^2)(\text{ClO}_4)_2(\text{H}_2\text{O})_3]$ | 3430 (s)<br>3212 (s)       | -                        | 1618 (s)<br>1598 (s)     | 1551 (s)                            | 1539(s)               | 1301(w)<br>1281 (m)      | 626(m)<br>484(m)                                                                                                | 539 (w)                                | 458 (w)<br>426(w)                     | 386 (w)<br>329(w)        | 1143(s) 1121(s) 1109(s)<br>1090(s)           |
| 3.      | $[\text{Cu}_3(\text{L}^3)(\text{ClO}_4)_2]$                       | 3491(sbr)                  | -                        | 1596 (s)                 | 1540 (s)                            | 1521 (s)              | 1276(m)                  | 651(m)<br>492(m)                                                                                                | 548 (w)                                | 448 (w)<br>430 (w)                    | 384(m)<br>303(w)         | 1175(s) 1140 (s),<br>1110 (s), 1080(s)       |

a, masked by ligand band

Table S3: Peak assignment in the mass spectra of homotrinary copper (II) complexes

| SI. No. | Complex                                                           | Molecular ions                                                                                | Expt. Mass     | Theo. Mass |
|---------|-------------------------------------------------------------------|-----------------------------------------------------------------------------------------------|----------------|------------|
| 1       | $[\text{Cu}_3(\text{L}^1)(\text{ClO}_4)_2]$                       | $[\text{Cu}_3(\text{H}_5\text{L}^1)(\text{HClO}_4)_2(\text{DMSO})_4(\text{H}_2\text{O})_2]^+$ | 1094.77        | 1094.65    |
|         |                                                                   | $[\text{Cu}_3(\text{L}^1)(\text{ClO}_4)_2(\text{DMSO})_3(\text{H}_2\text{O})_3]^+$            | 1027.63        | 1027.65    |
|         |                                                                   | $[\text{Cu}_3(\text{HL}^1)(\text{ClO}_4)_2(\text{DMSO})_2(\text{H}_2\text{O})_3]^+$           | 950.70         | 950.65     |
|         |                                                                   | $[\text{Cu}_3(\text{HL}^1)(\text{H}_2\text{O})]^+$                                            | 559.04         | 559.65     |
| 2       | $[\text{Cu}_3(\text{L}^2)(\text{ClO}_4)_2(\text{H}_2\text{O})_3]$ | $[\text{Cu}_3(\text{L}^2)(\text{ClO}_4)_2(\text{DMSO})]^+$                                    | 917.82         | 917.65     |
|         |                                                                   | $[\text{Cu}_3(\text{L}^2)(\text{ClO}_4)(\text{DMSO})(\text{H}_2\text{O})]^+$                  | 834.94         | 836.15     |
|         |                                                                   | $[\text{Cu}_3(\text{L}^2)(\text{DMSO})(\text{H}_2\text{O})]^+$                                | 735.10         | 736.65     |
|         |                                                                   | $[\text{Cu}_3(\text{L}^2)(\text{H}_2\text{O})]^+$                                             | 658.91         | 658.65     |
|         |                                                                   | $[\text{Cu}_2(\text{L}^2)(\text{H}_2\text{O})]^+$                                             | 594.06, 596.11 | 595.10     |
|         |                                                                   | $[\text{Cu}_2(\text{L}^2)]^+$                                                                 | 577.02, 578.92 | 577.10     |
| 3       | $[\text{Cu}_3(\text{L}^3)(\text{ClO}_4)_2]$                       | $[\text{Cu}_3(\text{H}_4\text{L}^3)(\text{ClO}_4)_2(\text{H}_2\text{O})_3]^+$                 | 956.17         | 955.65     |
|         |                                                                   | $[\text{Cu}_3(\text{H}_4\text{L}^3)(\text{ClO}_4)]^+$                                         | 802.45         | 802.15     |

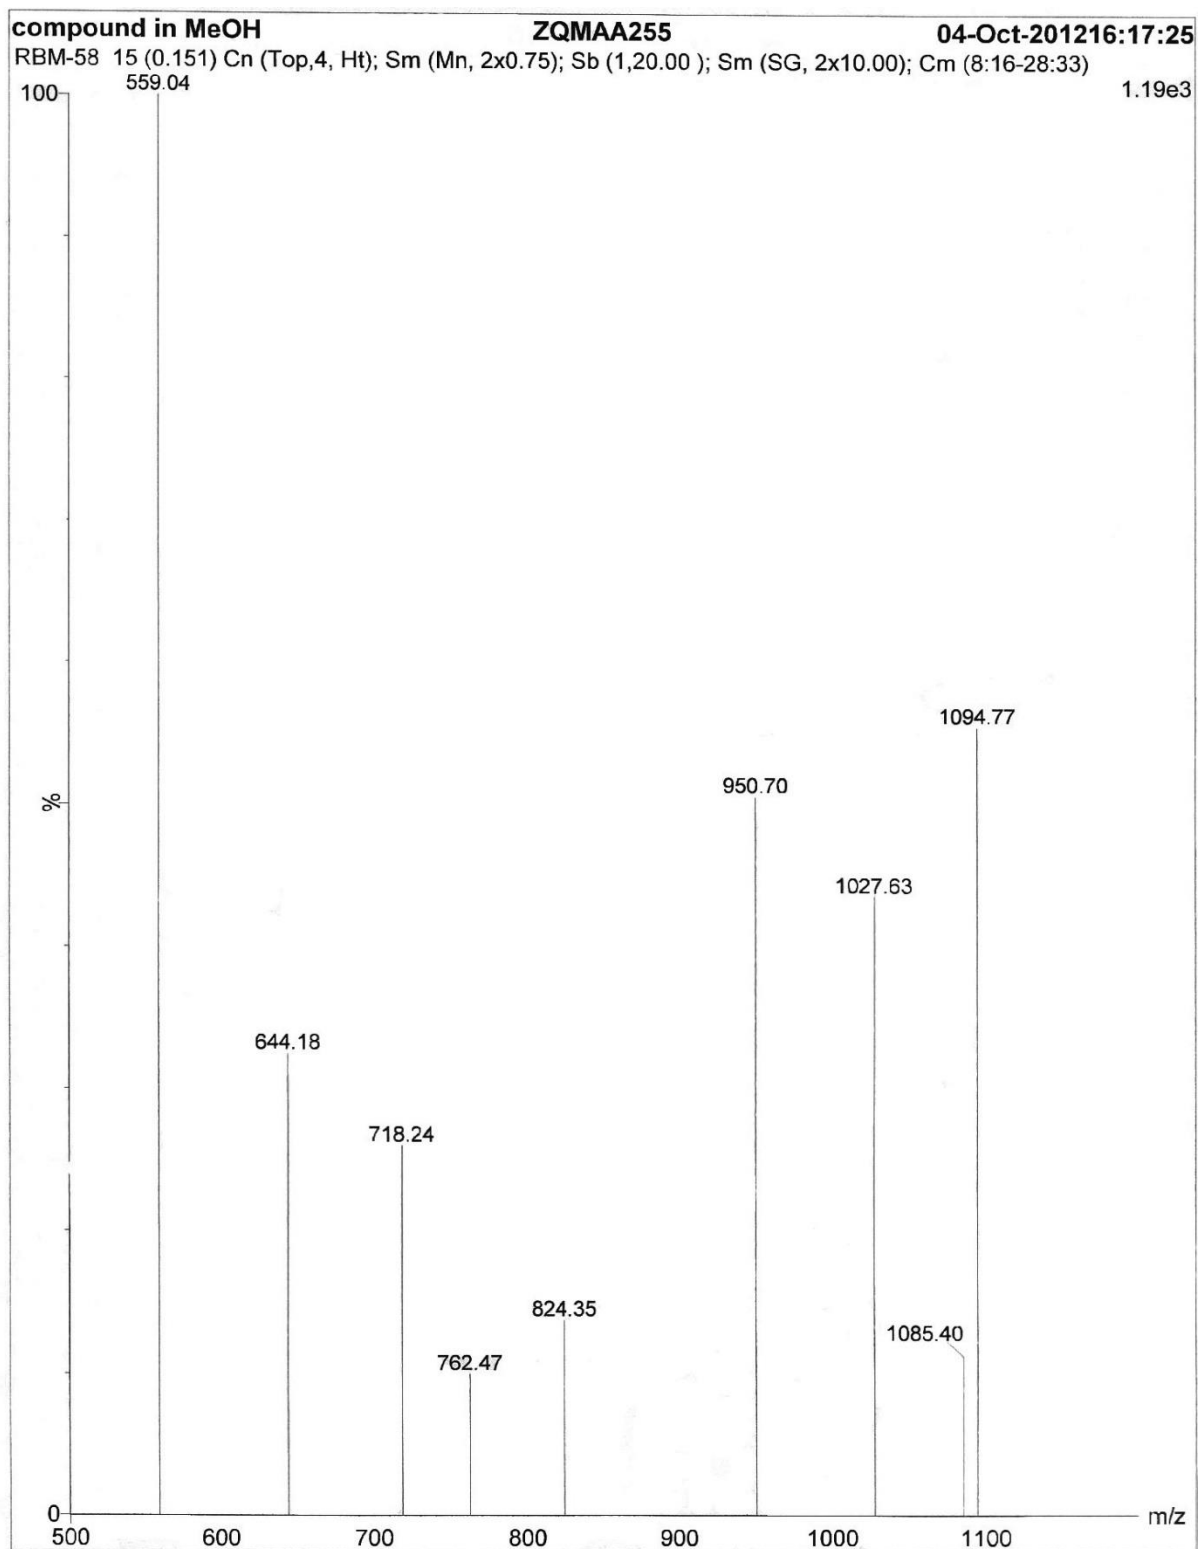

**Fig. S1.** Mass spectrum of the complex  $[\text{Cu}_3(\text{L}^1)(\text{ClO}_4)_2]$  (**1**) in DMSO solution.

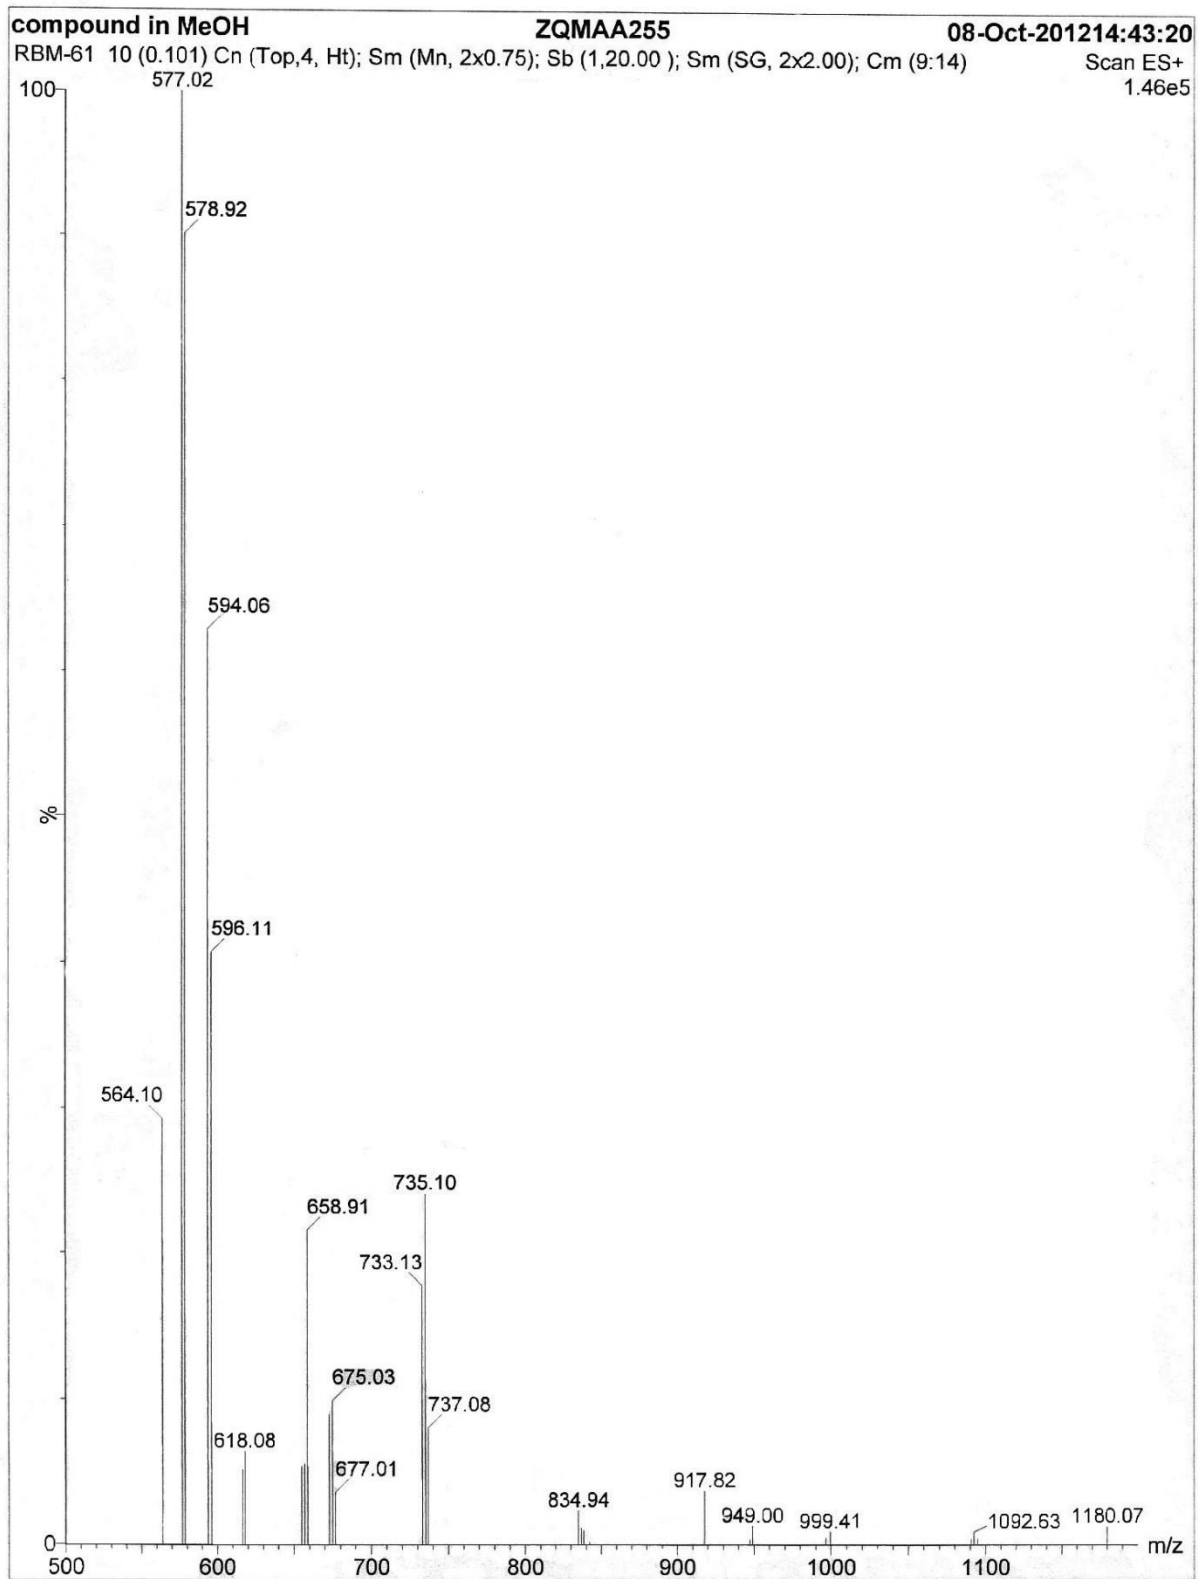

**Fig. S2.** Mass spectrum of the complex  $[\text{Cu}_3(\text{L}^2)(\text{ClO}_4)_2(\text{H}_2\text{O})_3]$  (**2**) in DMSO solution.

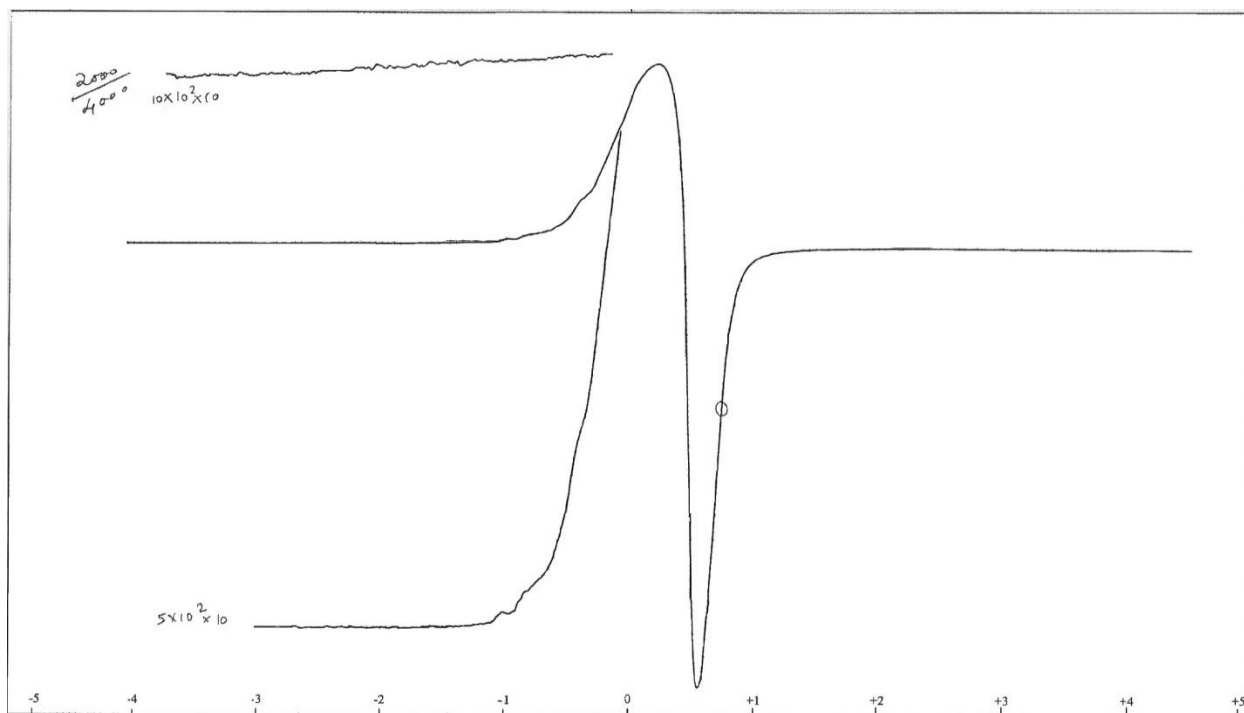

**Fig.S3.** EPR spectrum of the complex  $[\text{Cu}_3(\text{L}^2)(\text{ClO}_4)_2(\text{H}_2\text{O})_3]$  (**2**) in DMSO glass at LNT ( $f=9.1$  Mz)

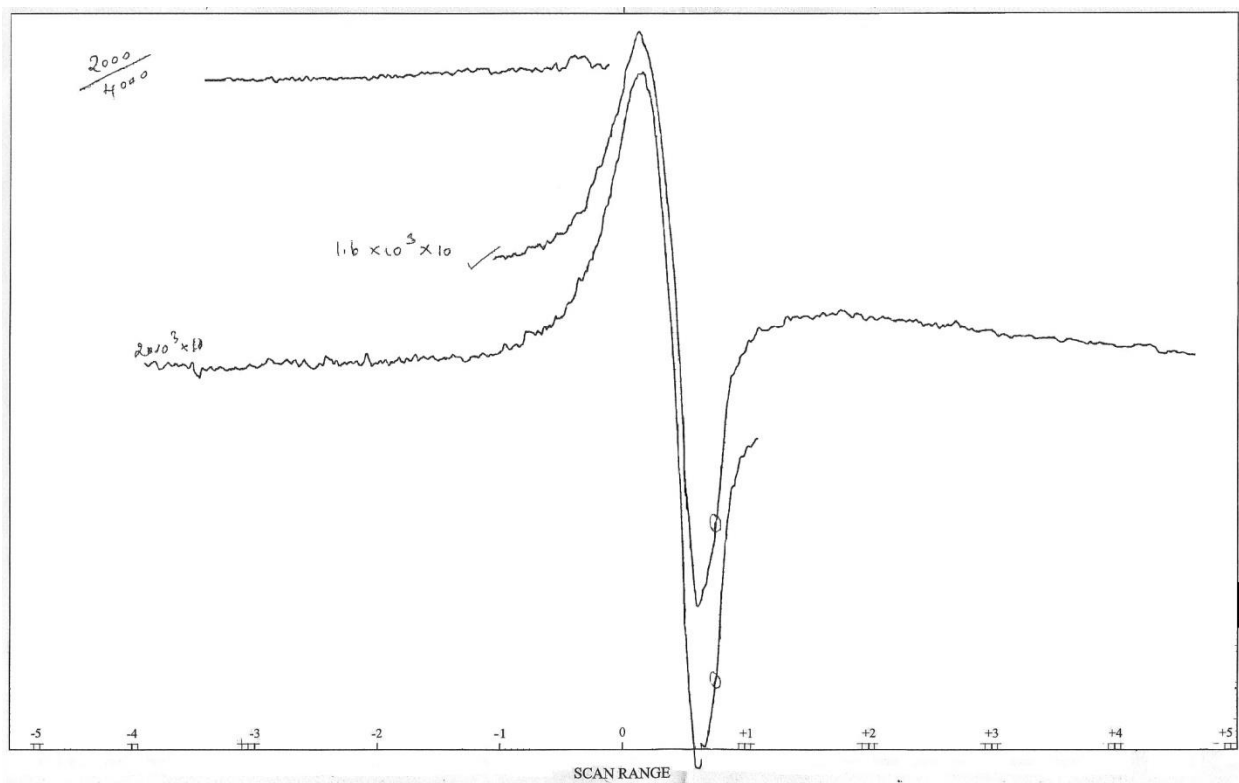

**Fig.S4.** EPR spectrum of the complex  $[\text{Cu}_3(\text{L}^3)(\text{ClO}_4)_2]$  (**3**) in DMSO glass at LNT ( $f=9.1$  Mz)

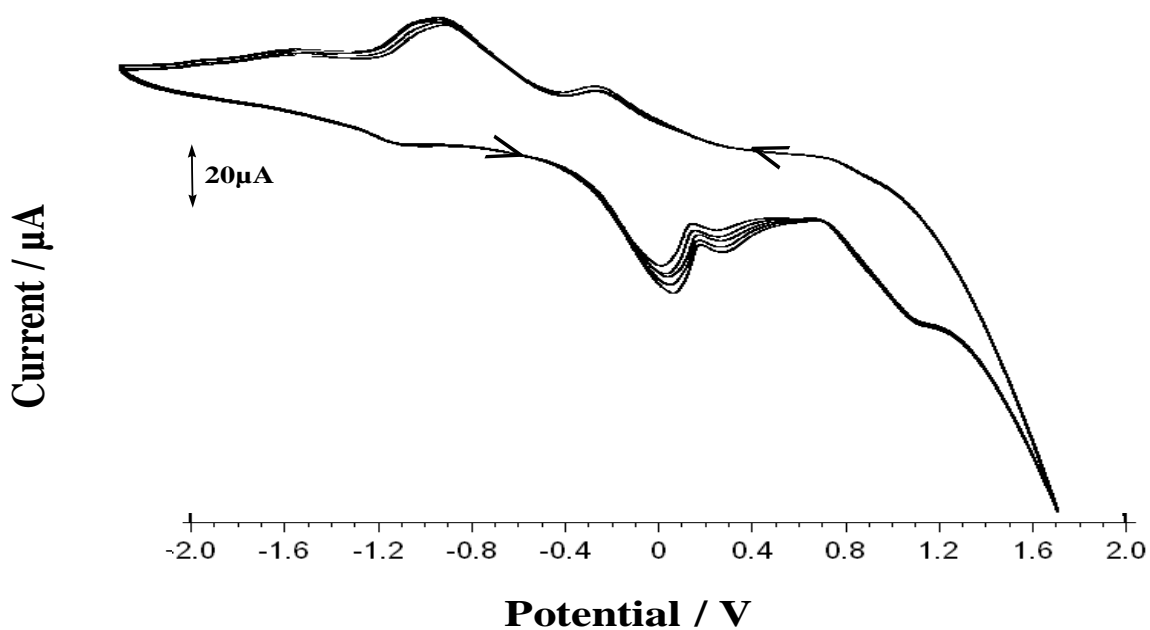

**Fig. S5.** Cyclic Voltammetry of complex  $[\text{Cu}_3(\text{L}^2)(\text{ClO}_4)_2(\text{H}_2\text{O})_3]$  (2) at 100 mV/s

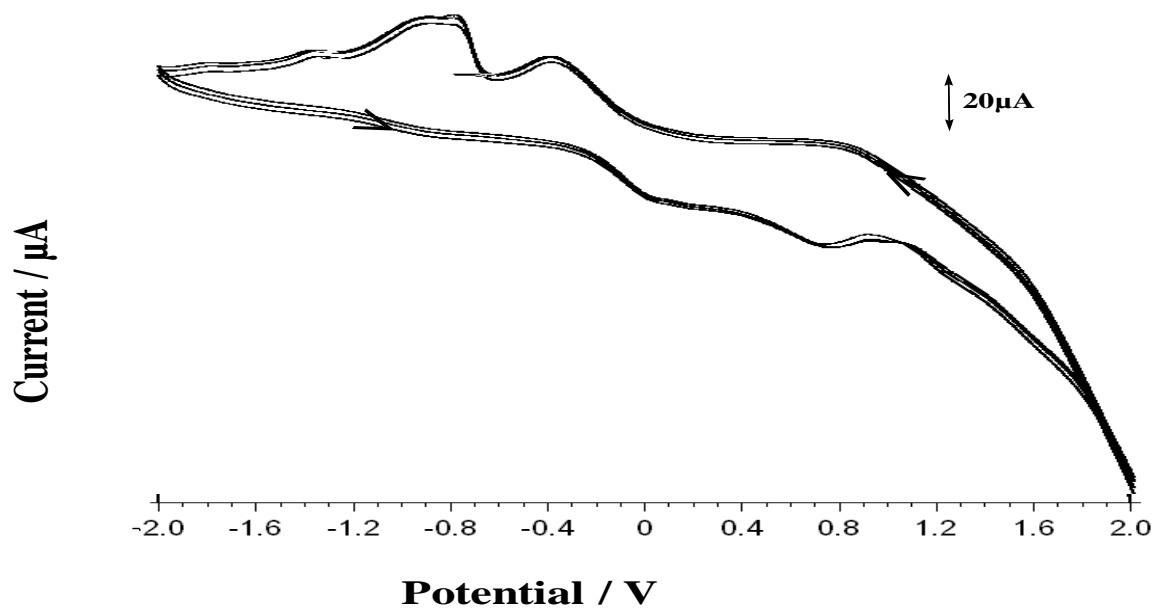

**Fig. S6.** Cyclic Voltammetry of complex  $[\text{Cu}_3(\text{L}^3)(\text{ClO}_4)_2]$  (3) at 100 mV/s
